# Supplementary material
Source: Springer Nature journal article supplement (https://www.springermedizin.de/resource/supplementary/12885_2006_761_MOESM3_ESM.pdf/9470254)

**A.**

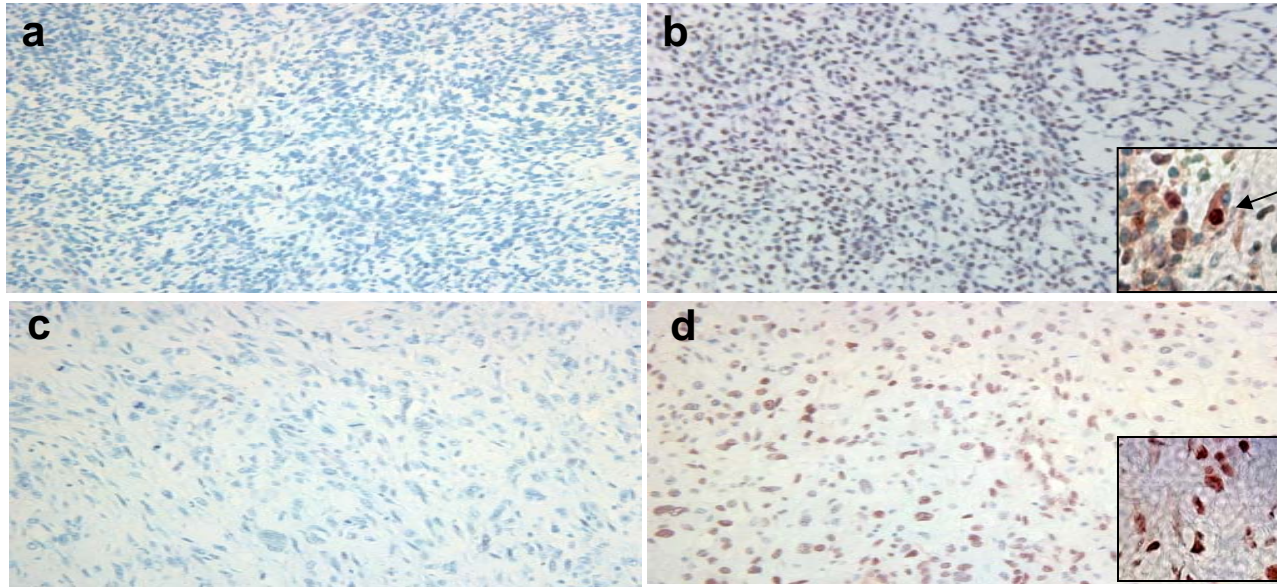

**B.**

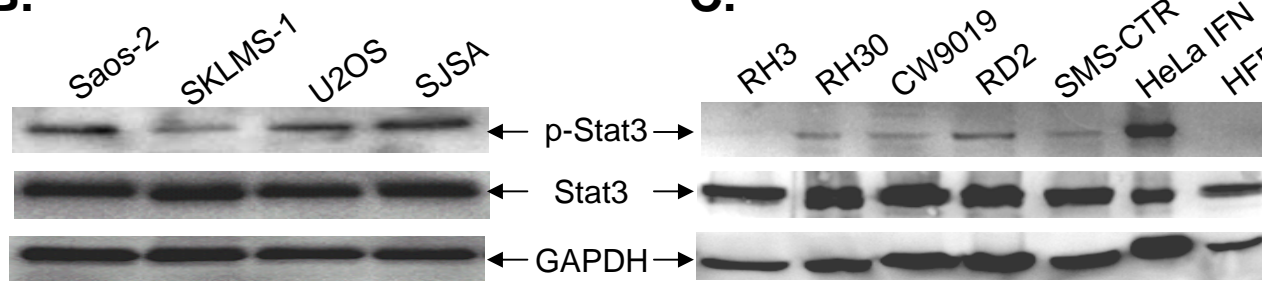

**C.**

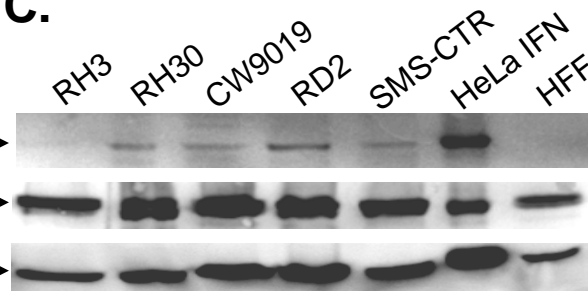

Supplement: MOESM3 [file 9470254]
